# Supplementary material
Source: Springer Nature journal article supplement (https://www.springermedizin.de/resource/supplementary/12884_2014_1138_MOESM5_ESM.docx/9458994)
Supplement: MOESM5 [file 9458994]

**Table 2** Selection criteria* for the preconception care experiment with scoring in deciles; the higher deciles represent a more likely qualification for inclusion.


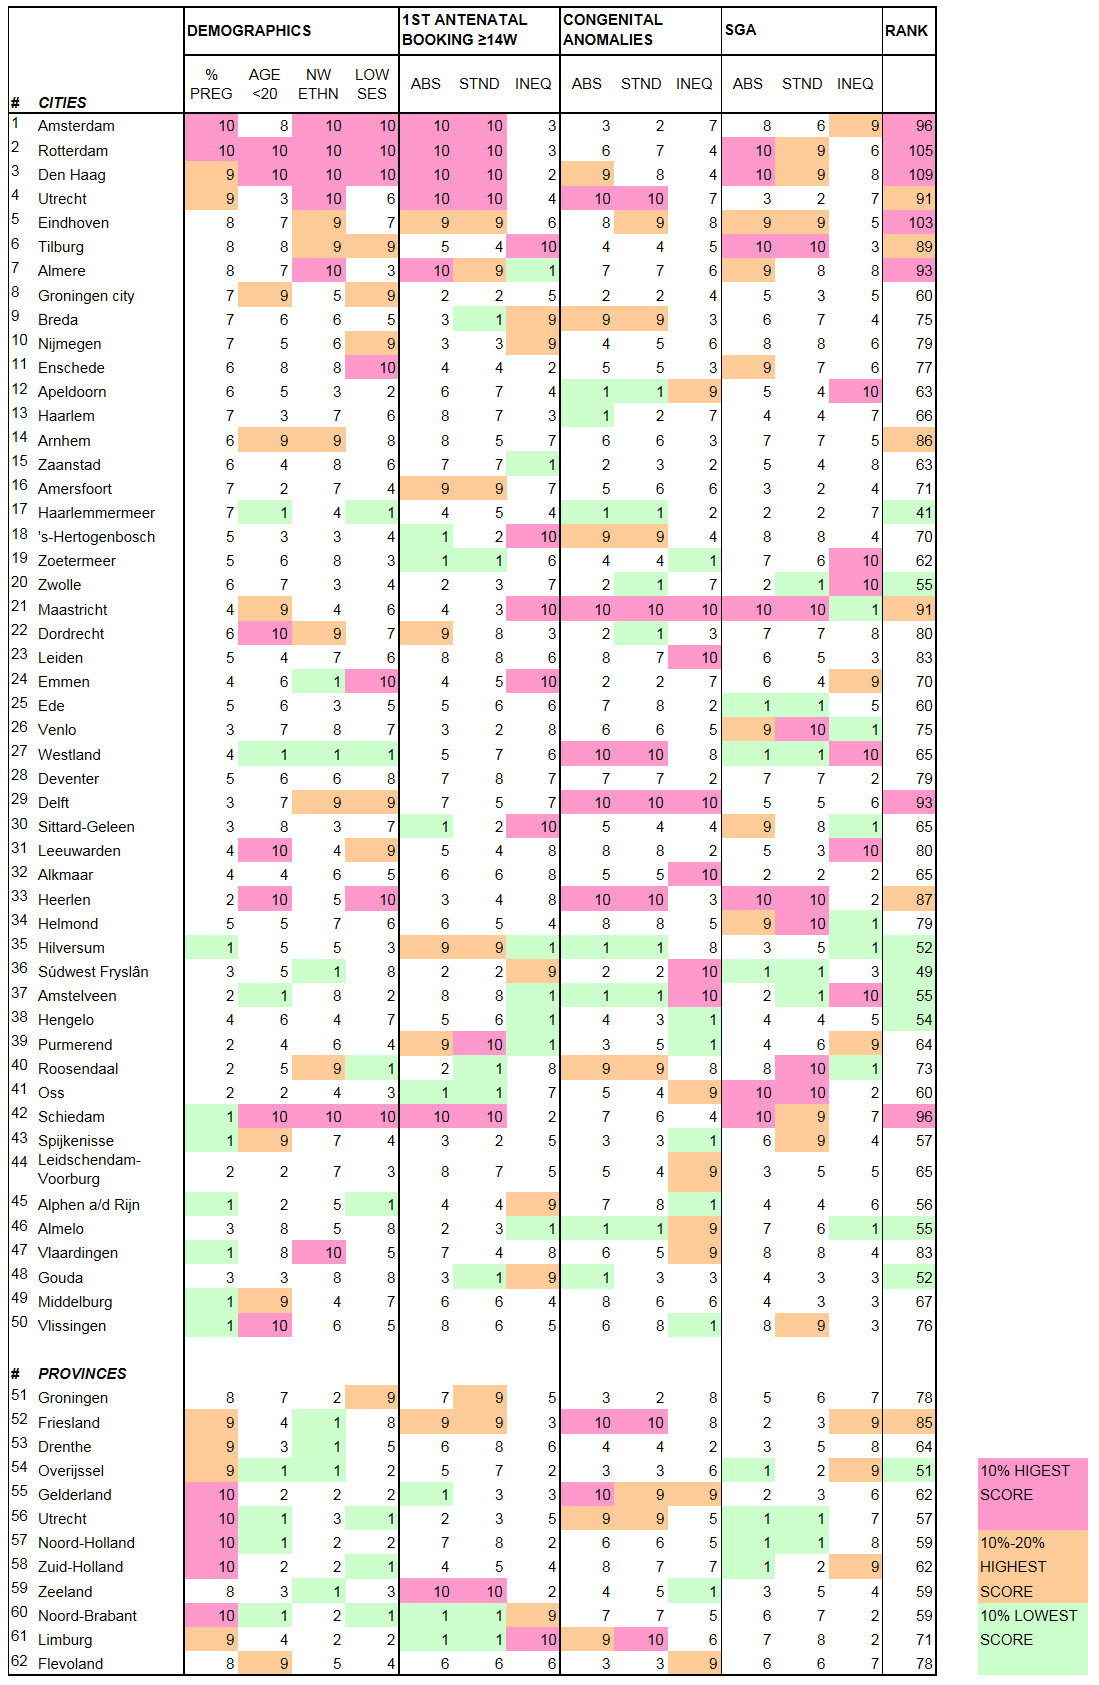


* '% PREG': % pregnant women in the general population / 'AGE <20': % teenage pregnancies / 'PRIMI': % primiparous women / 'NW ETHN': % non-Western pregnant women / 'LOW SES': % women in neighbourhoods with a socioeconomic status score <p20 / 'ABS': Absolute % / 'STND': Standardised % / 'INEQ': Inequality as measured by the relative risk of prevalences between women from neighbourhoods with socioeconomic status score <p20 compared to >p80

* '% PREG': % pregnant women in the general population / 'AGE <20': % teenage pregnancies / 'PRIMI': % primiparous women / 'NW ETHN': % non-Western pregnant women / 'LOW SES': % women in neighbourhoods with a socioeconomic status score <p20 / 'ABS': Absolute % / 'STND': Standardised % / 'INEQ': Inequality as measured by the relative risk of prevalences between women from neighbourhoods with socioeconomic status score <p20 compared to >p80
